# Supplementary material for: On the nature of the unusually long OO bond in HO3 and HO4 radicals
Source: Royal Society of Chemistry journal article supplement (doi:10.1039/b711464h), 2007-01-01
Supplement: b711464h.pdf [file b711464h.pdf]

## On the nature of the unusually long OO bond in HO<sub>3</sub> and HO<sub>4</sub> radicals.

Alex Mansergas,<sup>a</sup> Josep M. Anglada,<sup>a,\*</sup> Santiago Olivella,<sup>a</sup> Manuel F. Ruiz-López<sup>b</sup>  
and Marilia Martins-Costa<sup>b</sup>

<sup>a</sup> Theoretical and Computational Chemistry Group, Departament de Química Orgànica Biològica, Institut d'Investigacions Químiques i Ambientals de Barcelona, IIQAB – CSIC, C/ Jordi Girona 18, E-08034 Barcelona, Spain.

<sup>b</sup> Equipe de Chimie et Biochimie Théoriques, UMR CNRS-UHP No.7565 Nancy - University, BP 239, 54506 Vandoeuvre-les-Nancy, France  
E-mail: anglada@iiqab.csic.es

### (Supplementary information)

**Table S1.** Optimized geometrical parameters computed at different levels of theory for the *trans*-HO<sub>3</sub> radical.<sup>a</sup>

| Method <sup>b</sup>          | d(O <sub>1</sub> O <sub>2</sub> ) | D(O <sub>2</sub> O <sub>3</sub> ) | d(O <sub>3</sub> H <sub>4</sub> ) | A(O <sub>1</sub> O <sub>2</sub> O <sub>3</sub> ) | A(O <sub>2</sub> O <sub>3</sub> H <sub>4</sub> ) | D(O <sub>1</sub> O <sub>2</sub> O <sub>3</sub> H <sub>4</sub> ) |
|------------------------------|-----------------------------------|-----------------------------------|-----------------------------------|--------------------------------------------------|--------------------------------------------------|-----------------------------------------------------------------|
| <b>B3LYP/B2</b>              | 1.232                             | 1.545                             | 0.971                             | 110.3                                            | 98.6                                             | 0.0                                                             |
| <b>QCISD/B2</b>              | 1.244                             | 1.522                             | 0.967                             | 109.1                                            | 98.4                                             | 0.0                                                             |
| <b>CCSD(T)/B1</b>            | 1.244                             | 1.540                             | 0.971                             | 109.6                                            | 98.1                                             | 0.0                                                             |
| <b>CCSD(T)/B2</b>            | 1.247                             | 1.512                             | 0.969                             | 109.3                                            | 98.4                                             | 0.0                                                             |
| <b>CCSD(T)/B3</b>            | 1.251                             | 1.513                             | 0.972                             | 109.2                                            | 98.4                                             | 0.0                                                             |
| <b>CASSCF(7,7)/B2</b>        | 1.316                             | 1.459                             | 0.946                             | 108.2                                            | 100.9                                            | 91.0                                                            |
| <b>CASSCF(13,13)/B2</b>      | 1.227                             | 1.742                             | 0.975                             | 110.8                                            | 94.8                                             | 0.0                                                             |
| <b>CASSCF(15,13)/B2</b>      | 1.232                             | 1.660                             | 0.948                             | 110.5                                            | 96.8                                             | 0.0                                                             |
| <b>CASSCF(19,15)/B2</b>      | 1.223                             | 1.758                             | 0.976                             | 110.8                                            | 94.2                                             | 0.0                                                             |
| <b>MRCI/B1<sup>c</sup></b>   | 1.233                             | 1.647                             | 0.960                             | 107.4                                            | 96.6                                             | 0.0                                                             |
| <b>CASPT2 (13,11)/B2</b>     | 1.211                             | 1.739                             | 0.972                             | 110.5                                            | 94.9                                             | 0.0                                                             |
| <b>EXP<sup>d</sup></b>       | 1.225                             | 1.688                             | 0.972                             | 111.0                                            | 90.0                                             | 0.0                                                             |
| <b>MRCI+Q/B3<sup>d</sup></b> | 1.225                             | 1.677                             | 0.972                             | 110.2                                            | 95.9                                             | 0.0                                                             |

<sup>a</sup> Distances are in angstroms and angles in degrees. The atom numbering is as shown in Figure 1.

<sup>b</sup> B1 stands for 6-311+G(d,p), B2 stands for 6-311+G(2df,2p) and B3 stands for aug-cc-pVTZ.

<sup>c</sup> MRCI done over the CASSCF(13,13) set of molecular orbitals.

<sup>d</sup> Values taken from reference<sup>4</sup>.

**Table S2.** Calculated topological properties (in a.u.) at the *bcp* in the **HO<sub>3</sub>** and **HO<sub>4</sub>** radicals<sup>a</sup>.

| <b>x-y</b>                         | <b>r<sub>x</sub></b> | <b>r<sub>y</sub></b> | <b>ρ(<i>r</i><sub>bcp</sub>)</b> | <b>∇<sup>2</sup>ρ(<i>r</i><sub>bcp</sub>)</b> | <b>ε(<i>r</i><sub>bcp</sub>)</b> | <b>H<sub>b</sub>(<i>r</i><sub>bcp</sub>)</b> |
|------------------------------------|----------------------|----------------------|----------------------------------|-----------------------------------------------|----------------------------------|----------------------------------------------|
| <b><i>trans</i>-HO<sub>3</sub></b> |                      |                      |                                  |                                               |                                  |                                              |
| <b>H<sub>4</sub>-O<sub>3</sub></b> | 0.36010<br>(0.33826) | 1.46698<br>(1.45385) | 0.37241<br>(0.38997)             | -2.76199<br>(-2.94052)                        | 0.03589<br>(0.03734)             | -0.7633<br>(-0.8199)                         |
| <b>O<sub>3</sub>-O<sub>2</sub></b> | 1.44191<br>(1.57650) | 1.43422<br>(1.56091) | 0.23851<br>(0.16356)             | 0.16977<br>(0.31533)                          | 0.12061<br>(0.12671)             | -0.1471<br>(-0.0700)                         |
| <b>O<sub>2</sub>-O<sub>1</sub></b> | 1.14006<br>(1.13935) | 1.21182<br>(1.18916) | 0.48209<br>(0.50169)             | -0.32452<br>(-0.39095)                        | 0.00031<br>(0.00019)             | -0.5150<br>(-0.5783)                         |
| <b><i>cis</i>-HO<sub>4</sub></b>   |                      |                      |                                  |                                               |                                  |                                              |
| <b>O<sub>2</sub>-O<sub>1</sub></b> | 1.17039<br>(1.17007) | 1.13314<br>(1.13355) | 0.51845<br>(0.52054)             | -0.43209<br>(-0.46457)                        | 0.00889<br>(0.01290)             | -0.6169<br>(-0.6194)                         |
| <b>O<sub>3</sub>-O<sub>2</sub></b> | 1.59329<br>(1.59148) | 1.60311<br>(1.60454) | 0.15543<br>(0.15157)             | 0.31696<br>(0.37607)                          | 0.17903<br>(0.18781)             | -0.0621<br>(-0.0562)                         |
| <b>O<sub>4</sub>-O<sub>3</sub></b> | 1.28255<br>(1.28252) | 1.26978<br>(1.27068) | 0.36612<br>(0.36771)             | -0.08548<br>(-0.11026)                        | 0.02835<br>(0.03593)             | -0.3319<br>(-0.3329)                         |
| <b>H<sub>5</sub>-O<sub>4</sub></b> | 0.34620<br>(0.35244) | 1.48142<br>(1.47499) | 0.37310<br>(0.37782)             | -2.81723<br>(-2.83035)                        | 0.03420<br>(0.03681)             | -0.7832<br>(-0.7838)                         |
| <b>O<sub>4</sub>-O<sub>1</sub></b> | 2.29715<br>(2.29905) | 2.27371<br>(2.26876) | 0.02618<br>(0.02521)             | 0.13433<br>(0.13911)                          | 0.95375<br>(0.94771)             | -0.0045<br>(-0.0054)                         |
| <b>ring</b>                        |                      |                      | 0.02584<br>(0.02489)             | 0.16265<br>(0.16573)                          |                                  |                                              |
| <b><i>trans</i>-HO<sub>4</sub></b> |                      |                      |                                  |                                               |                                  |                                              |

|                                    |         |         |         |          |         |         |
|------------------------------------|---------|---------|---------|----------|---------|---------|
| <b>O<sub>2</sub>-O<sub>1</sub></b> | 1.19446 | 1.13991 | 0.49574 | -0.35693 | 0.00075 | -0.5688 |
| <b>O<sub>3</sub>-O<sub>2</sub></b> | 1.49261 | 1.49874 | 0.20695 | 0.24271  | 0.18813 | -0.1194 |
| <b>O<sub>4</sub>-O<sub>3</sub></b> | 1.29729 | 1.30485 | 0.34325 | -0.06411 | 0.00957 | -0.2978 |
| <b>H<sub>5</sub>-O<sub>4</sub></b> | 0.34689 | 1.47813 | 0.37449 | -2.82069 | 0.03824 | -0.8577 |

<sup>a</sup> Computed employing the first order density matrix obtained at QCISD/6311+G(2df,2p) and MRCI/6311+G(2df,2p) (in parenthesis) levels of theory. Atom numbering is as shown in Figure 1.
